# Supplementary material for: Species-Associated Differences in the Below-Ground Microbiomes of Wild and Domesticated Setaria
Source: Front Plant Sci. 2018 Aug 21;9:1183. doi: 10.3389/fpls.2018.01183 (PMC6111228; doi:10.3389/fpls.2018.01183)
Supplement: Supplementary file 7 [file Table_7.xlsx]

## Sheet: Sheet1
Supplementary Table 7 - Species and compartment specific bacterial OTUs predicated from LEFSe analysis
Class	OTU	LogMaxMean	LDA	pValue
REE.SI	Otu0000011	4.67639	4.34478	5.66517e-08
REE.SI	Otu0000015	4.42768	4.1084	3.78007e-08
REE.SI	Otu0000016	4.44056	4.09093	0.0031819
REE.SI	Otu0000028	3.81954	3.49385	1.54978e-11
REE.SI	Otu0000057	3.53148	3.21036	2.52794e-09
REE.SI	Otu0000082	3.26847	2.99399	4.87119e-07
REE.SI	Otu0000090	3.03476	2.72931	1.26227e-09
REE.SI	Otu0000093	3.05008	2.74935	5.00239e-08
REE.SI	Otu0000104	2.80919	2.42619	0.000133444
REE.SI	Otu0000111	3.23187	2.90142	5.03424e-06
REE.SI	Otu0000113	3.26717	2.93626	1.2791e-05
REE.SI	Otu0000114	3.09303	2.74612	0.00620537
REE.SI	Otu0000127	3.01657	2.72092	1.31601e-05
REE.SI	Otu0000132	2.93785	2.64609	2.74096e-08
REE.SI	Otu0000142	3.0048	2.68432	0.0246192
REE.SI	Otu0000151	2.69897	2.40055	1.54414e-07
REE.SI	Otu0000156	2.80543	2.4918	6.7164e-08
REE.SI	Otu0000163	2.94885	2.63716	2.40351e-07
REE.SI	Otu0000165	3.09884	2.80377	4.72682e-06
REE.SI	Otu0000181	2.84164	2.52487	7.99199e-05
REE.SI	Otu0000183	2.87827	2.56276	0.000141796
REE.SI	Otu0000230	2.78612	2.46541	8.40889e-05
REE.SI	Otu0000247	2.70852	2.40722	1.52874e-06
REE.SI	Otu0000272	2.71321	2.42403	3.56676e-06
REE.SI	Otu0000279	2.51558	2.23183	3.59703e-05
REE.SI	Otu0000304	2.81661	2.51634	0.000298581
REE.SI	Otu0000333	2.55764	2.28982	1.14106e-10
REE.SI	Otu0000346	2.83463	2.55764	8.23738e-07
REE.SI	Otu0000404	2.34679	2.05383	4.05169e-06
REE.SI	Otu0000411	2.51558	2.23856	9.28774e-11
REE.SI	Otu0000419	2.4523	2.21191	2.29797e-05
REE.SI	Otu0000430	2.35751	2.082	1.96738e-05
REE.SI	Otu0000447	2.34679	2.00218	0.00518487
REE.SI	Otu0000450	2.32451	2.05891	3.20675e-06
REE.SI	Otu0000475	2.30103	2.05532	0.000690996
REE.SI	Otu0000476	2.46073	2.19204	3.65225e-05
REE.SI	Otu0000495	2.48509	2.21462	0.001222
REE.SI	Otu0000533	2.62554	2.37403	3.18293e-06
REE.SI	Otu0000539	2.43492	2.18203	2.93859e-06
REE.SI	Otu0000558	2.60805	2.34226	1.55466e-05
REE.SI	Otu0000582	2.50816	2.25958	2.74065e-06
REE.SI	Otu0000588	2.56427	2.29923	1.09596e-06
REE.SI	Otu0000597	2.66381	2.38068	0.000316469
REE.SI	Otu0000604	2.34679	2.10482	5.06681e-06
REE.SI	Otu0000623	2.26324	2.06457	6.98773e-07
REE.SI	Otu0000625	2.54407	2.29296	1.8229e-06
REE.SI	Otu0000632	2.19189	2.02007	0.000156831
REE.SI	Otu0000640	2.54407	2.27273	0.000953261
REE.SI	Otu0000664	2.469	2.17703	0.000160617
REE.SI	Otu0000667	2.39794	2.1417	1.23263e-05
REE.SI	Otu0000686	2.43492	2.17771	8.98633e-05
REE.SI	Otu0000688	2.54407	2.27418	3.02402e-06
REE.SI	Otu0000715	2.40749	2.15913	8.36847e-05
REE.SI	Otu0000717	2.2888	2.03723	0.000994757
REE.SI	Otu0000729	2.33579	2.09027	3.12203e-05
REE.SI	Otu0000750	2.4523	2.22844	1.45992e-07
REE.SI	Otu0000766	2.34679	2.1584	3.37468e-06
REE.SI	Otu0000767	2.42597	2.15297	3.79014e-06
REE.SI	Otu0000771	2.30103	2.06687	0.000440741
REE.SI	Otu0000793	2.49292	2.25246	4.48011e-06
REE.SI	Otu0000826	2.41683	2.1976	0.00280927
REE.SI	Otu0000831	2.4437	2.22815	6.95601e-08
REE.SI	Otu0000835	2.469	2.21554	3.07814e-07
REE.SI	Otu0000845	2.5006	2.27453	9.04099e-06
REE.SI	Otu0000851	2.41683	2.19628	3.11864e-05
REE.SI	Otu0000879	2.36798	2.1277	7.34398e-05
REE.SI	Otu0000960	2.22185	2.03328	0.00070583
REE.SI	Otu0000981	2.22185	2.05537	0.000154153
REE.SI	Otu0001034	2.31293	2.04771	0.000187463
REE.SI	Otu0001070	2.54407	2.26804	2.52098e-06
REE.SI	Otu0001071	2.22185	2.04153	2.65773e-07
REE.SI	Otu0001072	2.31293	2.13838	7.61768e-08
REE.SI	Otu0001095	2.26324	2.06257	0.00298868
REE.SI	Otu0001123	2.41683	2.22369	5.19647e-05
REE.SI	Otu0001155	2.23609	2.02395	6.25108e-06
REE.SI	Otu0001243	2.39794	2.1564	3.33209e-05
REE.SI	Otu0001329	2.17609	2.06981	2.60659e-05
REE.SI	Otu0001426	2.27621	2.0495	2.4888e-05
REE.SI	Otu0001475	2.20713	2.06101	0.00053292
REE.SI	Otu0001496	2.23609	2.09653	4.51094e-06
REN.SI	Otu0000005	5.01935	4.68875	5.31072e-11
REN.SI	Otu0000006	4.95211	4.6384	1.87232e-07
REN.SI	Otu0000007	5.03225	4.71203	2.83016e-09
REN.SI	Otu0000010	4.51323	4.22959	2.12246e-08
REN.SI	Otu0000031	3.94596	3.66892	6.03679e-08
REN.SI	Otu0000062	2.94291	2.64224	5.10876e-06
REN.SI	Otu0000081	3.00684	2.68529	3.01831e-06
REN.SI	Otu0000101	3.058	2.78226	3.35007e-10
REN.SI	Otu0000105	2.98508	2.69419	3.69464e-06
REN.SI	Otu0000116	2.80838	2.5578	6.05541e-05
REN.SI	Otu0000135	2.793	2.52259	5.4737e-05
REN.SI	Otu0000138	2.86143	2.58739	9.78524e-11
REN.SI	Otu0000146	2.89789	2.6031	1.11725e-07
REN.SI	Otu0000162	2.82869	2.54108	6.61069e-07
REN.SI	Otu0000172	2.38993	2.14655	3.89701e-05
REN.SI	Otu0000176	2.93371	2.69821	1.14604e-08
REN.SI	Otu0000178	2.85518	2.55464	0.000144013
REN.SI	Otu0000179	2.45959	2.14507	3.09193e-05
REN.SI	Otu0000182	2.29809	2.05424	0.000178151
REN.SI	Otu0000207	2.44889	2.1797	0.000497192
REN.SI	Otu0000208	2.59428	2.32411	2.1125e-06
REN.SI	Otu0000212	2.78903	2.54028	1.00614e-09
REN.SI	Otu0000215	2.86435	2.60474	1.78195e-06
REN.SI	Otu0000218	2.80506	2.5498	3.4123e-08
REN.SI	Otu0000226	2.65883	2.39244	8.26343e-07
REN.SI	Otu0000227	2.52437	2.21879	1.52978e-07
REN.SI	Otu0000315	2.55935	2.29053	1.00588e-08
REN.SI	Otu0000342	2.23029	2.01445	9.32883e-05
REN.SI	Otu0000356	2.5808	2.31647	2.13283e-06
REN.SI	Otu0000387	2.47538	2.22914	3.09393e-07
REN.SI	Otu0000393	2.40077	2.1537	0.000493857
REN.SI	Otu0000439	2.51549	2.26165	7.4135e-07
REN.SI	Otu0000467	2.51554	2.26802	2.07987e-08
REN.SI	Otu0000477	2.37984	2.13897	2.40467e-06
REN.SI	Otu0000478	2.41104	2.17076	3.97313e-10
REN.SI	Otu0000483	2.4017	2.12456	2.25053e-06
REN.SI	Otu0000505	2.35888	2.12098	9.30937e-07
REN.SI	Otu0000509	2.45917	2.1794	3.11343e-07
REN.SI	Otu0000511	2.27368	2.0248	0.00333063
REN.SI	Otu0000528	2.34732	2.09398	1.33749e-05
REN.SI	Otu0000545	2.42191	2.15422	9.09276e-08
REN.SI	Otu0000564	2.43061	2.17335	5.55416e-08
REN.SI	Otu0000633	2.22988	2.02198	1.31773e-06
REN.SI	Otu0000635	2.3808	2.1415	5.5625e-10
REN.SI	Otu0000712	2.24606	2.00894	0.00263132
REN.SI	Otu0000790	2.28743	2.04078	5.44851e-05
REN.SI	Otu0000799	2.28646	2.0503	2.8269e-08
REN.SI	Otu0000824	2.2589	2.04383	2.34326e-06
REN.SI	Otu0000884	2.26036	2.0548	6.77475e-10
REN.SI	Otu0000999	2.31285	2.05574	2.59944e-05
REN.SI	Otu0001005	2.28526	2.08062	7.99347e-09
Rh.SI	Otu0000001	5.69179	5.41198	2.47224e-12
Rh.SI	Otu0000045	3.56493	3.39148	7.62934e-11
Rh.SI	Otu0000095	3.14267	2.756	2.43277e-07
Rh.SI	Otu0000123	2.93225	2.79143	2.53001e-06
Rh.SI	Otu0000170	2.75756	2.43828	5.95186e-07
Rh.SI	Otu0000269	2.77003	2.43685	2.83089e-08
REE.SV	Otu0000004	5.29562	4.97883	1.33538e-12
REE.SV	Otu0000014	4.45826	4.15969	1.06815e-11
REE.SV	Otu0000023	3.98114	3.65886	2.22205e-10
REE.SV	Otu0000032	3.77573	3.48312	1.93148e-10
REE.SV	Otu0000036	3.64755	3.29048	5.24147e-07
REE.SV	Otu0000038	3.81347	3.53079	2.34823e-10
REE.SV	Otu0000044	3.68124	3.3651	3.77741e-11
REE.SV	Otu0000053	3.53148	3.21961	2.46736e-12
REE.SV	Otu0000061	3.42461	3.12232	6.16462e-12
REE.SV	Otu0000070	3.15886	2.81867	0.000106719
REE.SV	Otu0000078	3.08814	2.73147	0.000877311
REE.SV	Otu0000086	3.01072	2.7231	5.96289e-07
REE.SV	Otu0000097	3.10266	2.81531	2.34542e-08
REE.SV	Otu0000107	3.20412	2.93407	6.61716e-11
REE.SV	Otu0000122	2.93785	2.58061	1.60566e-07
REE.SV	Otu0000147	2.8399	2.51305	1.8127e-05
REE.SV	Otu0000152	2.8451	2.53545	6.08044e-09
REE.SV	Otu0000155	2.69897	2.37951	0.000128442
REE.SV	Otu0000161	2.69897	2.36428	0.00552187
REE.SV	Otu0000166	2.73373	2.41406	2.68489e-06
REE.SV	Otu0000173	2.80731	2.53935	1.0508e-09
REE.SV	Otu0000191	3.03141	2.73579	1.00793e-05
REE.SV	Otu0000200	2.60206	2.30894	0.000103337
REE.SV	Otu0000220	2.70615	2.36726	0.000104311
REE.SV	Otu0000233	2.69167	2.41369	9.57032e-11
REE.SV	Otu0000239	2.61979	2.31492	0.00071424
REE.SV	Otu0000243	2.60206	2.32493	3.97075e-05
REE.SV	Otu0000244	2.77815	2.48901	1.30797e-05
REE.SV	Otu0000275	2.69167	2.40646	2.26074e-07
REE.SV	Otu0000391	2.41218	2.15402	0.000250351
REE.SV	Otu0000400	2.81291	2.52084	3.13442e-09
REE.SV	Otu0000406	2.77815	2.50955	5.54042e-05
REE.SV	Otu0000413	2.63682	2.38524	7.0652e-06
REE.SV	Otu0000416	2.22185	2.0057	0.00839514
REE.SV	Otu0000444	2.61979	2.3613	2.67872e-07
REE.SV	Otu0000486	2.56427	2.30739	1.1254e-06
REE.SV	Otu0000490	2.38322	2.10338	6.98891e-05
REE.SV	Otu0000492	2.41218	2.17354	4.6372e-06
REE.SV	Otu0000497	2.43933	2.22748	8.5507e-07
REE.SV	Otu0000544	2.38322	2.17004	1.67524e-05
REE.SV	Otu0000614	2.5006	2.30042	3.04823e-07
REE.SV	Otu0000615	2.56427	2.32906	2.19975e-09
REE.SV	Otu0000656	2.39794	2.12314	3.61817e-09
REE.SV	Otu0000659	2.48902	2.22683	1.23784e-09
REE.SV	Otu0000661	2.22185	2.08732	2.36489e-09
REE.SV	Otu0000668	2.33579	2.11729	1.73383e-06
REE.SV	Otu0000679	2.43933	2.16829	1.13163e-05
REE.SV	Otu0000691	2.26324	2.06629	5.29281e-07
REE.SV	Otu0000735	2.35218	2.10699	1.05256e-05
REE.SV	Otu0000786	2.38322	2.17653	2.36137e-08
REE.SV	Otu0000795	2.52288	2.29348	7.18545e-05
REE.SV	Otu0000808	2.30103	2.12765	4.4653e-06
REE.SV	Otu0000820	2.39794	2.14832	0.00048121
REE.SV	Otu0000898	2.17609	2.01749	0.000351987
REE.SV	Otu0000928	2.36798	2.15099	1.78403e-05
REE.SV	Otu0000967	2.56427	2.29804	7.26756e-09
REE.SV	Otu0000985	2.28255	2.12436	3.62956e-07
REE.SV	Otu0000997	2.24304	2.11118	8.06657e-07
REE.SV	Otu0001024	2.26324	2.1169	2.72822e-05
REE.SV	Otu0001033	2.30103	2.07791	0.000172025
REE.SV	Otu0001042	2.15127	2.00051	9.23947e-05
REE.SV	Otu0001053	2.26324	2.09891	0.000256843
REE.SV	Otu0001054	2.35218	2.18527	3.14994e-06
REE.SV	Otu0001105	1.82391	2.00468	0.0259435
REE.SV	Otu0001162	2.31876	2.17537	1.07783e-07
REE.SV	Otu0001172	2.19957	2.05749	5.11289e-05
REE.SV	Otu0001343	2.09691	2.06293	1.41742e-05
REE.SV	Otu0001371	2.26324	2.11867	6.96761e-07
REE.SV	Otu0001449	2.33579	2.14022	4.37207e-10
REN.SV	Otu0000003	5.63878	5.32573	1.27348e-11
REN.SV	Otu0000012	4.59464	4.28327	4.57997e-08
REN.SV	Otu0000037	3.60656	3.28673	6.50182e-11
REN.SV	Otu0000049	3.39476	3.0501	4.96981e-08
REN.SV	Otu0000073	3.47417	3.17472	6.14031e-08
REN.SV	Otu0000077	2.99658	2.59762	1.55726e-08
REN.SV	Otu0000080	3.02276	2.69208	1.31377e-05
REN.SV	Otu0000083	3.20475	2.90733	2.34591e-06
REN.SV	Otu0000118	2.83568	2.49945	1.49725e-06
REN.SV	Otu0000199	2.76717	2.53622	1.11012e-10
REN.SV	Otu0000221	2.49013	2.25596	2.01501e-09
REN.SV	Otu0000274	2.73496	2.49313	8.9684e-08
REN.SV	Otu0000278	2.63795	2.37489	7.75056e-11
REN.SV	Otu0000284	2.59393	2.34549	2.42617e-07
REN.SV	Otu0000286	2.7846	2.52618	2.67378e-06
REN.SV	Otu0000290	2.51267	2.25218	1.43612e-08
REN.SV	Otu0000293	2.38441	2.20152	1.69838e-07
REN.SV	Otu0000318	2.47779	2.25683	2.22675e-11
REN.SV	Otu0000329	2.46553	2.25297	1.1909e-08
REN.SV	Otu0000362	2.51379	2.33401	3.75511e-09
REN.SV	Otu0000380	2.28376	2.00221	0.000177782
REN.SV	Otu0000410	2.43961	2.23871	2.07347e-06
REN.SV	Otu0000417	2.52304	2.2737	1.29028e-06
REN.SV	Otu0000421	2.41343	2.28528	7.09393e-09
REN.SV	Otu0000453	2.67777	2.46643	6.01448e-11
REN.SV	Otu0000458	2.62962	2.39296	1.3927e-09
REN.SV	Otu0000460	2.3986	2.25968	6.68255e-07
REN.SV	Otu0000479	2.56469	2.3348	1.53599e-08
REN.SV	Otu0000491	2.48945	2.27749	9.16185e-08
REN.SV	Otu0000508	2.45327	2.24114	1.54632e-05
REN.SV	Otu0000513	2.47779	2.25596	1.38897e-07
REN.SV	Otu0000514	2.42668	2.25221	1.004e-08
REN.SV	Otu0000517	2.47797	2.28915	4.16794e-08
REN.SV	Otu0000519	2.36821	2.21014	3.06913e-06
REN.SV	Otu0000526	2.50211	2.31396	3.83883e-09
REN.SV	Otu0000532	2.52335	2.30657	1.00743e-07
REN.SV	Otu0000540	2.44002	2.3074	3.00775e-07
REN.SV	Otu0000548	2.44026	2.30778	8.96061e-12
REN.SV	Otu0000549	2.20091	2.03173	8.5362e-06
REN.SV	Otu0000560	2.35307	2.18145	1.05915e-09
REN.SV	Otu0000569	2.35282	2.22874	1.92292e-09
REN.SV	Otu0000570	2.58401	2.31191	3.06858e-07
REN.SV	Otu0000575	2.36849	2.18024	2.66204e-09
REN.SV	Otu0000580	2.38381	2.2455	2.55836e-07
REN.SV	Otu0000586	2.20027	2.09844	0.000655869
REN.SV	Otu0000621	2.58442	2.35406	8.32709e-06
REN.SV	Otu0000627	2.43986	2.30512	3.82805e-12
REN.SV	Otu0000629	2.39905	2.23518	5.39851e-09
REN.SV	Otu0000631	2.58459	2.36042	3.07028e-07
REN.SV	Otu0000649	2.3685	2.24385	7.07944e-08
REN.SV	Otu0000663	2.59357	2.34749	1.39392e-07
REN.SV	Otu0000665	2.33625	2.22237	4.68545e-08
REN.SV	Otu0000673	2.38459	2.18908	1.76251e-05
REN.SV	Otu0000694	2.31966	2.20404	7.89295e-08
REN.SV	Otu0000700	2.47831	2.33125	7.69978e-08
REN.SV	Otu0000710	2.33671	2.24617	2.37141e-09
REN.SV	Otu0000727	2.33742	2.24624	2.99127e-09
REN.SV	Otu0000734	2.26402	2.15694	1.64702e-07
REN.SV	Otu0000743	2.41368	2.25038	2.06689e-10
REN.SV	Otu0000748	2.32025	2.20938	6.81341e-08
REN.SV	Otu0000764	2.31988	2.18971	3.10747e-11
REN.SV	Otu0000768	2.52404	2.29627	1.55431e-06
REN.SV	Otu0000773	2.19992	2.0869	5.35999e-07
REN.SV	Otu0000789	2.48942	2.28956	1.54332e-08
REN.SV	Otu0000792	2.41338	2.28126	1.5448e-09
REN.SV	Otu0000796	2.44034	2.2657	1.11171e-05
REN.SV	Otu0000798	2.28359	2.19788	2.91137e-08
REN.SV	Otu0000814	2.24348	2.19976	5.37574e-06
REN.SV	Otu0000815	2.28456	2.10123	1.69993e-08
REN.SV	Otu0000832	2.15228	2.12507	1.44293e-07
REN.SV	Otu0000841	2.36798	2.20872	0.000240092
REN.SV	Otu0000843	2.30186	2.18981	2.4147e-07
REN.SV	Otu0000849	2.31945	2.19668	3.57035e-10
REN.SV	Otu0000850	2.35258	2.24004	1.69786e-12
REN.SV	Otu0000853	2.15127	2.04922	8.73472e-05
REN.SV	Otu0000865	2.28354	2.20339	1.69998e-06
REN.SV	Otu0000868	2.28485	2.15453	2.13236e-07
REN.SV	Otu0000872	2.35326	2.1641	1.0409e-09
REN.SV	Otu0000899	2.38395	2.21947	3.35992e-09
REN.SV	Otu0000902	2.26415	2.11605	4.23128e-07
REN.SV	Otu0000910	2.26415	2.21074	2.4282e-07
REN.SV	Otu0000927	2.42701	2.28326	3.39233e-09
REN.SV	Otu0000934	2.09904	2.11643	1.29734e-05
REN.SV	Otu0000937	2.28301	2.18673	2.0813e-08
REN.SV	Otu0000938	2.41338	2.26126	3.42518e-07
REN.SV	Otu0000944	2.0978	2.05517	0.000201742
REN.SV	Otu0000959	2.17646	2.01866	0.00133166
REN.SV	Otu0000975	2.4268	2.28357	4.18878e-06
REN.SV	Otu0000977	2.15408	2.05717	4.84954e-06
REN.SV	Otu0000979	2.36869	2.25036	1.15142e-08
REN.SV	Otu0000987	2.49028	2.30256	1.55431e-06
REN.SV	Otu0000998	2.36874	2.25488	3.50949e-10
REN.SV	Otu0001006	2.24437	2.21945	6.28478e-10
REN.SV	Otu0001013	2.03476	2.06165	0.000666724
REN.SV	Otu0001018	2.24437	2.19285	7.84412e-10
REN.SV	Otu0001075	2.0978	2.12719	9.77085e-06
REN.SV	Otu0001089	2.1775	2.08305	1.88616e-05
REN.SV	Otu0001104	2.22271	2.17822	1.18022e-08
REN.SV	Otu0001109	2.15181	2.13562	2.89731e-09
REN.SV	Otu0001110	2.17713	2.10845	1.82204e-08
REN.SV	Otu0001115	2.22265	2.12345	7.62628e-05
REN.SV	Otu0001127	2.2233	2.12603	8.89034e-07
REN.SV	Otu0001130	2.22251	2.24114	5.76471e-09
REN.SV	Otu0001131	2.1766	2.06451	8.77051e-06
REN.SV	Otu0001135	2.03476	2.18983	1.97668e-05
REN.SV	Otu0001137	2.09807	2.12748	2.53951e-09
REN.SV	Otu0001140	2.45288	2.27608	4.26726e-07
REN.SV	Otu0001148	2.22251	2.17891	0.000218977
REN.SV	Otu0001167	2.19971	2.12424	2.71138e-07
REN.SV	Otu0001168	2.22297	2.16057	2.34296e-09
REN.SV	Otu0001171	2.20035	2.21455	1.90698e-09
REN.SV	Otu0001175	2.1515	2.17231	0.000106479
REN.SV	Otu0001185	2.20013	2.08283	1.37362e-07
REN.SV	Otu0001199	2.20006	2.11741	3.4786e-07
REN.SV	Otu0001210	2.12567	2.01319	3.86932e-05
REN.SV	Otu0001215	2.15244	2.2175	2.19024e-10
REN.SV	Otu0001245	2.12602	2.16585	2.11024e-06
REN.SV	Otu0001260	2.42618	2.24599	4.95566e-08
REN.SV	Otu0001270	2.15307	2.13036	1.01197e-06
REN.SV	Otu0001279	2.12552	2.07471	0.000785809
REN.SV	Otu0001289	2.15244	2.06089	2.08582e-07
REN.SV	Otu0001295	2.33738	2.17441	1.7778e-06
REN.SV	Otu0001307	2.06837	2.10097	1.16783e-07
REN.SV	Otu0001317	2.20077	2.19198	3.19102e-07
REN.SV	Otu0001321	2.15213	2.14376	4.83491e-06
REN.SV	Otu0001332	1.96365	2.09597	2.01563e-05
REN.SV	Otu0001335	2.2007	2.21495	5.13443e-06
REN.SV	Otu0001354	2.15283	2.06736	1.51616e-05
REN.SV	Otu0001368	2.00111	2.14975	0.000668471
REN.SV	Otu0001373	2.12635	2.03927	0.000141372
REN.SV	Otu0001374	2.06752	2.17175	1.39062e-05
REN.SV	Otu0001376	2.03496	2.04519	2.85239e-05
REN.SV	Otu0001382	2.15196	2.18154	1.17588e-09
REN.SV	Otu0001389	2.12593	2.13097	3.60966e-09
REN.SV	Otu0001406	2.06713	2.06262	9.55351e-06
REN.SV	Otu0001418	2.15205	2.05288	0.000754441
REN.SV	Otu0001419	2.12535	2.1246	3.11676e-05
REN.SV	Otu0001421	1.76628	2.00834	0.000772844
REN.SV	Otu0001491	2.26445	2.2407	6.97811e-07
REN.SV	Otu0001500	2.12627	2.08101	4.9242e-06
REN.SV	Otu0001505	2.03558	2.00495	6.01202e-05
Rh.SV	Otu0000008	4.9345	4.58686	2.21564e-08
Rh.SV	Otu0000019	3.80844	3.58851	2.28528e-10
Rh.SV	Otu0000039	4.0685	3.71218	0.000165256
Rh.SV	Otu0000050	3.19728	2.76108	0.00193806
Rh.SV	Otu0000076	3.49136	3.14831	0.000468957
Rh.SV	Otu0000119	2.75967	2.44659	0.00333618
Rh.SV	Otu0000184	2.69897	2.38318	7.69205e-05
Rh.SV	Otu0000193	2.59292	2.25593	0.000591202
Rh.SV	Otu0000234	2.77815	2.43935	0.000174053
Rh.SV	Otu0000266	2.69897	2.36425	3.55998e-06
Rh.SV	Otu0000412	2.8451	2.50434	1.13128e-05
Rh.SV	Otu0000976	2.59292	2.287	9.29121e-06
Rh.SV	Otu0001056	2.39794	2.07203	2.51786e-05
Rh.SV	Otu0001139	2.41218	2.07259	9.97476e-07
